# Supplementary material for: Cholecystokinin Receptor Antagonist Improves Efficacy of Chemotherapy in Murine Models of Pancreatic Cancer by Altering the Tumor Microenvironment
Source: MDPI journal article supplement (doi:10.3390/cancers13194949), 2021-09-30
Supplement: s1 [file s1]

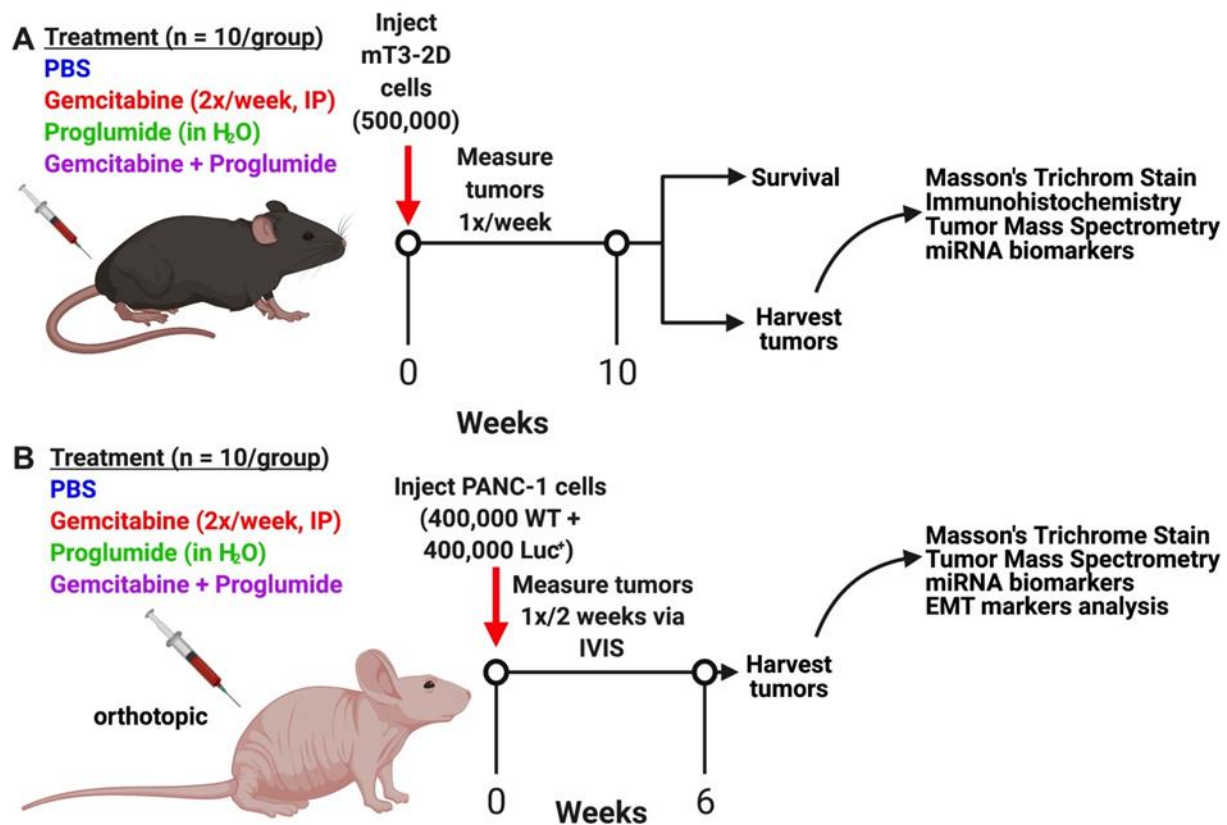

**Figure S1.** Study Design. (A) The first animal model used was an immunocompetent C57BL/6 with female mice injected subcutaneously with 500,000 mT3-2D syngeneic murine pancreatic cancer cells. This study was a survival study and tumors were euthanized when a diameter of 20mm was reached. Tumors were measured with calipers and the volume calculated by the formula:  $L \times W^2 \times 0.5$ . (B) The second animal model included immune deficient athymic nude male mice with orthotopic human PANC-1 tumors (800,000). Tumors were measured by luciferase flux in an IVIS machine. All the tumors in this study were harvested the same day after 6-weeks of therapy and metastases counted and dissected. In both studies there were 4 groups of mice (N=10 each) treated with PBS-control (0.1ml IP, 2X/week); gemcitabine monotherapy (100mg/kg, 100 $\mu$ l IP twice weekly); proglumide in drinking water (0.1 mg/ml), or the combination of gemcitabine and proglumide (same dose as monotherapy).

Table S1. qRT-PCR primers and miRNA primers.

| qRT-PCR primers  |                          |                         |
|------------------|--------------------------|-------------------------|
| Gene             | Forward (5' → 3')        | Reverse (5' → 3')       |
| <i>Vimentin</i>  | TCCACACGCACCTACAGTCT     | CCGAGGACCGGGTCACATA     |
| <i>Zeb1</i>      | GCTGGCAAGACAACGTGAAAG    | GCCTCAGGATAAATGACGGC    |
| <i>Zeb2</i>      | GGGACAGATCAGCACCAAAT     | GACCCAGAATGAGACAAGCG    |
| <i>SNAIL</i>     | GGAAGCCTAACTACAGCGAGCT   | TCCCAGATGAGCATTGGCA     |
| <i>B-CATENIN</i> | AACTTGCCACACGRGCAATC     | GCTGGCTCAAGTCAAAGTCC    |
| <i>TGFBR2</i>    | GCTCCCAGCCTTCATCCTTT     | CTTGAGCAATCAGGAGCCCA    |
| <i>Myh4</i>      | AGAGCCAAGAGGAAACTGGAGG   | CTCGTCCTCAATCTTGCTCTGC  |
| <i>IL10</i>      | CGGGAAGACAATAACTGCACCC   | CGGTTAGCAGTATGTTGTCCAGC |
| <i>Pcdhga7</i>   | CAGCCAAGTTAGCTGTGAGAAAAG | GGCTTGAGAGAAACGCCAGTCA  |
| <i>GAPDH (H)</i> | GTCTCCTCTGACTTCAACAGCG   | ACCACCCTCTTGCTGTAGCCAA  |
| <i>Gapdh (m)</i> | GTGAAGGTCGGAGTCAACGGATT  | AGTGATGGCATGGACTGTGGTC  |

| miRNA              | miRNA sequence                |
|--------------------|-------------------------------|
| <i>miR-185-5p</i>  | 5'-UGGAGAGAAAGGCAGUUCCUGA-3'  |
| <i>miR-346-5p</i>  | 5'-UGUCUGCCCGAGUGCCUGCCUCU-3  |
| <i>miR-378-3p</i>  | 5'-ACUGGACUUGGAGUCAGAAGGC-3'  |
| <i>miR-708-5p</i>  | 5'-AAGGAGCUUACAAUCUAGCUGGG-3' |
| <i>miR-141-5p</i>  | 5'-CAUCUUCAGUACAGUGUUGGA-3'   |
| <i>miR-200b-5p</i> | 5'-CAUCUUCUGGGCAGCAUUGGA-3'   |
| <i>miR-205-5p</i>  | 5'-UCCUUCAUUCCACCGGAGUCUG-3'  |

## Supplementary Methods

### 1. Mass Spectroscopy Methods:

1.1. Reagents and chemicals: The following reagents were purchased: solvents such as acetonitrile, isopropanol and methanol Optima grade (Fisher Scientific); high purity formic acid (99%) (Thermo-Scientific); gemcitabine human GMP grade (Sagent Pharmaceutical); and debrisoquine (Sigma- Aldrich).

1.2. Preparation of tissue samples: The tissue samples were stored at -80°C and thawed on ice (4°C). Tissue samples, (20 mg wet weight) were processed by the addition of extraction buffer (500 µL, methanol) containing internal standard (400 ng/ml, debrisoquine). The samples were vortexed for 30 seconds followed by homogenization for 1 minute. The samples were incubated on ice for 20 min followed by incubation at -20°C for 20 min. Sample were centrifuged at 13,000 rpm for 20 min at 4°C. 12.5 µL of the supernatant was taken and diluted up to 1 ml, vortexed well before transferring to the Mass Spec sample vial for LC-MS analysis. A pooled QC was generated by mixing 30 µL of each sample.

1.3. Liquid Chromatography-Mass Spectrometry: The LC gradient method started with 100% of mobile phase A (0.2% formic acid in water) that involved a gradient change from 0% B (0.2% formic acid in acetonitrile) to 80% phase B in 1.5 minutes after an initial lag phase of 1.5 minutes with flow rate changing from 0.2 ml/min to 0.35 ml/min at 1.5 min and to 0.5 ml/ml at 3 min. The column was maintained at 40°C and injection volume was kept at 5 µL. The column eluent was introduced directly into the TQS mass spectrometer by electrospray operating in positive mode at a capillary voltage of 3.00 kV and a sampling cone voltage of 70 V. The desolvation gas flow was set to 500 L/hour and the desolvation temperature was set to 500°C. The cone gas flow was 150 L/hour and the source temperature was set to 150 °C. The sample cone voltage and collision energies were optimized for the analyte to obtain maximum ion intensity for parent and daughter ions using “IntelliStart” feature of MassLynx software (Waters

Corporation). The instrument parameters were optimized to gain maximum specificity and sensitivity of ionization for the parent and daughter ions. Signal intensities from the MRM Q1>Q3 ion pairs for the drug gemcitabine (264.2>112) and DBQ (176.3>134.1, IS) were ranked to ensure selection of the most intense precursor and fragment ion pair for MRM-based quantitation. This approach resulted in selection of cone voltages and collision energies that maximized the generation of each fragment ion species.

**A**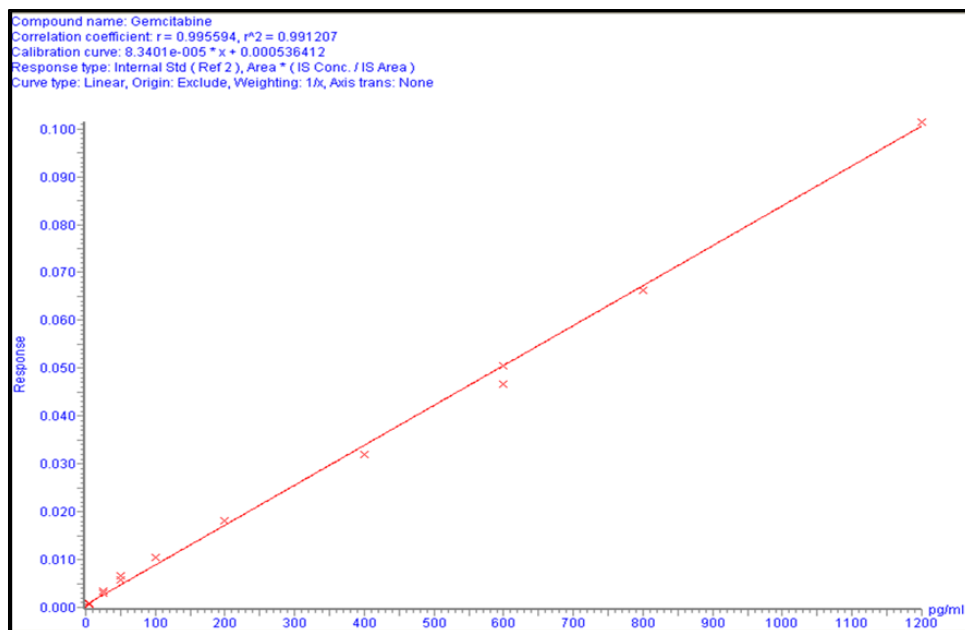**B**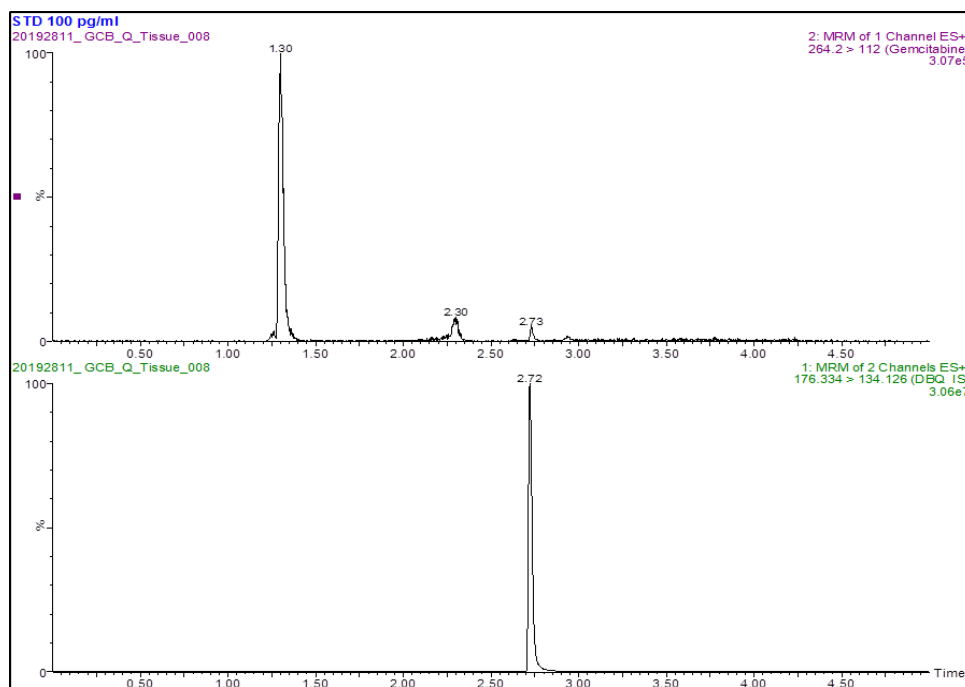

**Figure S2.** UPLC-MRM MS analysis of Gemcitabine mT3-2D immunocompetent subcutaneous mouse tumors treated with Gemcitabine alone or in combination therapy with Proglumide. **(A)** A standard calibration curve for gemcitabine concentrations is shown in the mentioned range. **(B)** A sample chromatogram of eluted gemcitabine and internal standard (DBQ) using the LC gradient is shown, as described in methods.

Table S2. Number of metastases in each in specific organs.

| Group       | Liver | Mesentery/<br>Peritoneum | Nodes | Spleen | Diaphragm | Abdominal<br>Wall | Stomach | Colon |
|-------------|-------|--------------------------|-------|--------|-----------|-------------------|---------|-------|
| PBS         | 4     | 22                       | 2     | 5      | 1         | 2                 | 6       | 3     |
| Gemcitabine | 4     | 12                       | 1     | 5      | 0         | 1                 | 2       | 5     |
| Proglumide  | 2     | 18                       | 2     | 1      | 0         | 2                 | 2       | 3     |
| Combination | 0     | 3                        | 0     | 1      | 1         | 0                 | 0       | 1     |



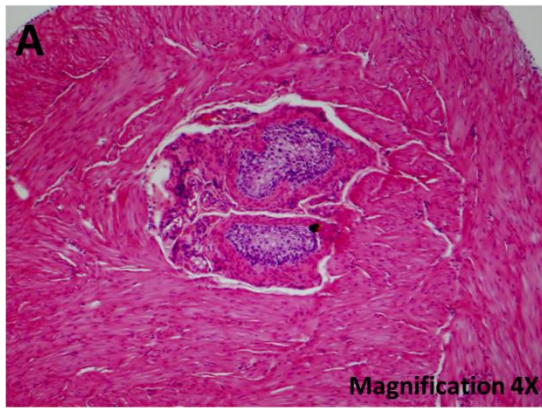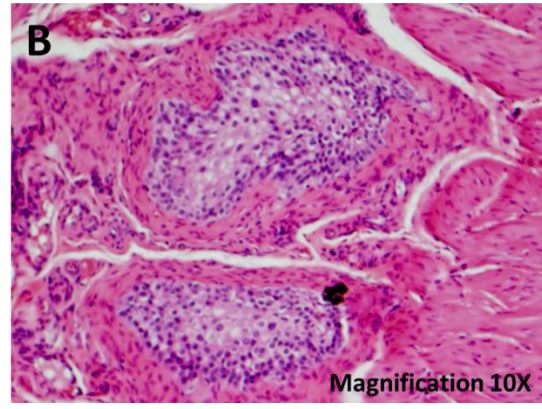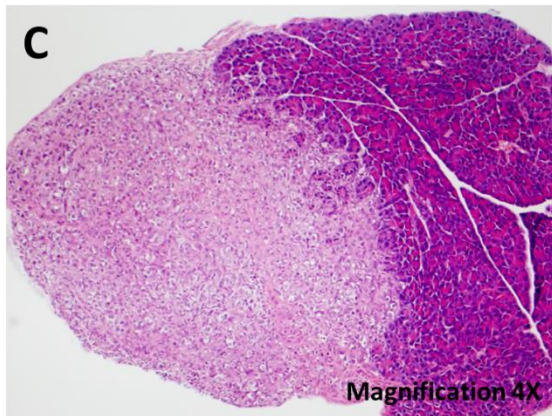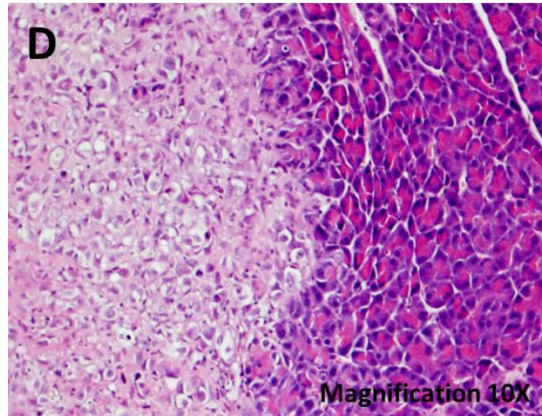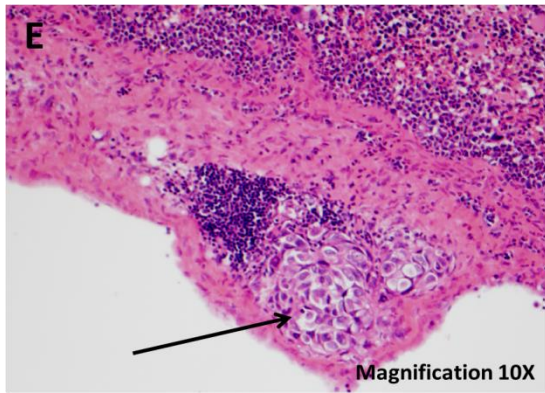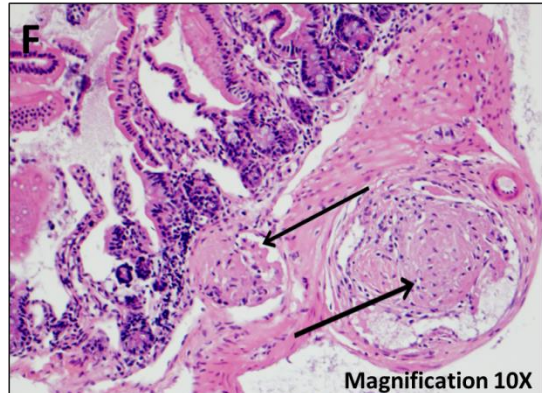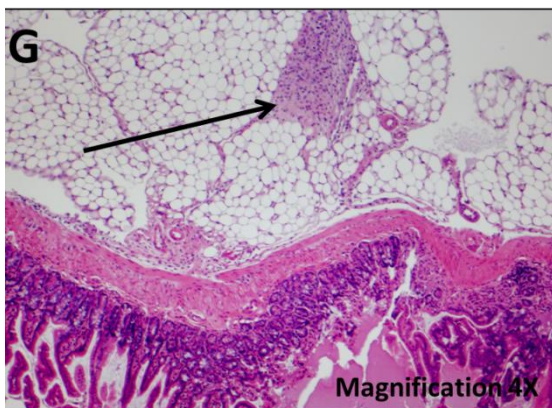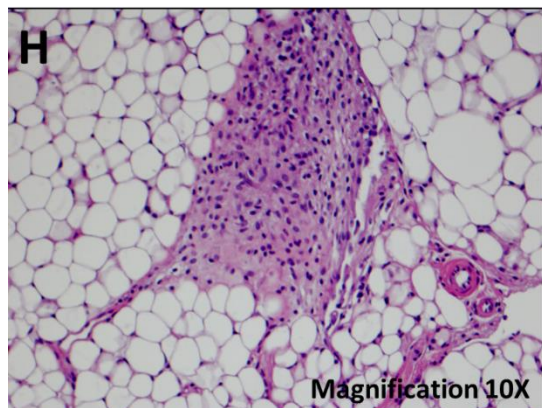

**Figure S3.** Histologic confirmation of pancreatic cancer metastases. **(A)** Tumor emboli are found in the abdominal wall between muscle fiber of a PBS-treated control mouse at low magnification (4X magnification). **(B)** The same image from panel (A) is magnified to demonstrate two foci of metastases in the abdominal wall. **(C)** PANC-1 pancreatic cancer metastases to the liver from a mouse treated with proglumide monotherapy at low magnification. **(D)** Higher magnification of the liver metastases from panel (C) is shown with invading cancer cells (left) and normal liver parenchyma (right). **(E)** Metastasis to the splenic capsule is identified in a mouse treated with gemcitabine monotherapy (10X magnification). Arrow is pointing to the PANC-1 cancer cells. **(F)** Tumor metastases are shown in the mesentery adjacent to the colon. Arrows point to two areas of tumor cells. **(G)** Cancer metastases within the fatty peritoneum intestine is shown at a low magnification adjacent to the. (Arrow points to cancer cells). **(H)** Higher power magnification showing the PANC-1 cancer cells metastases in the peritoneum.



## Original western blots Figures S4

FAP:

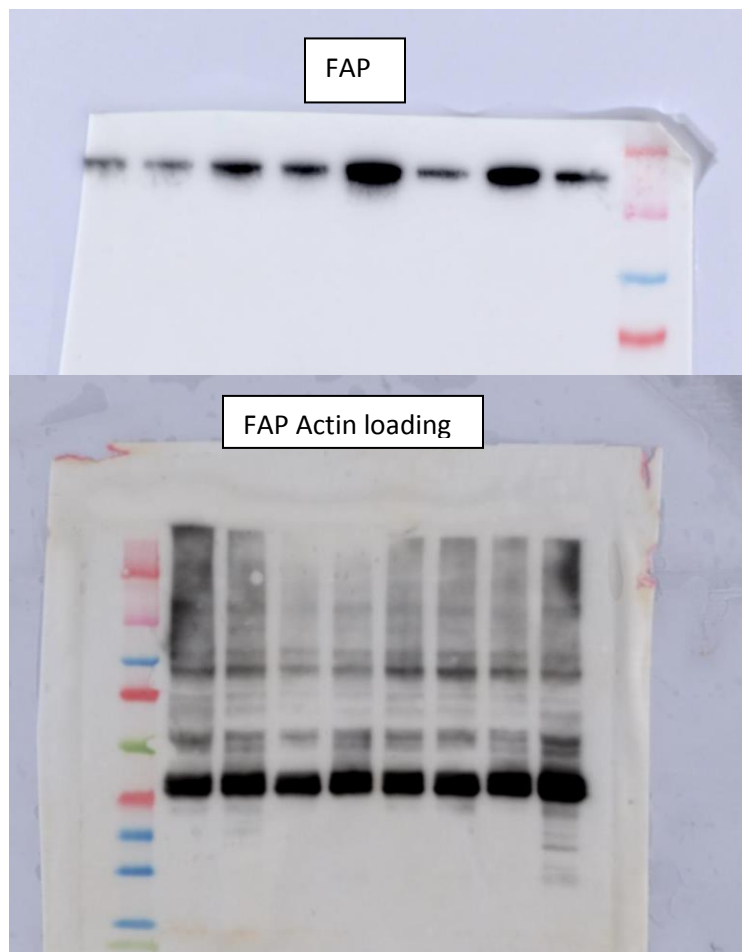

Phospho-paxillin

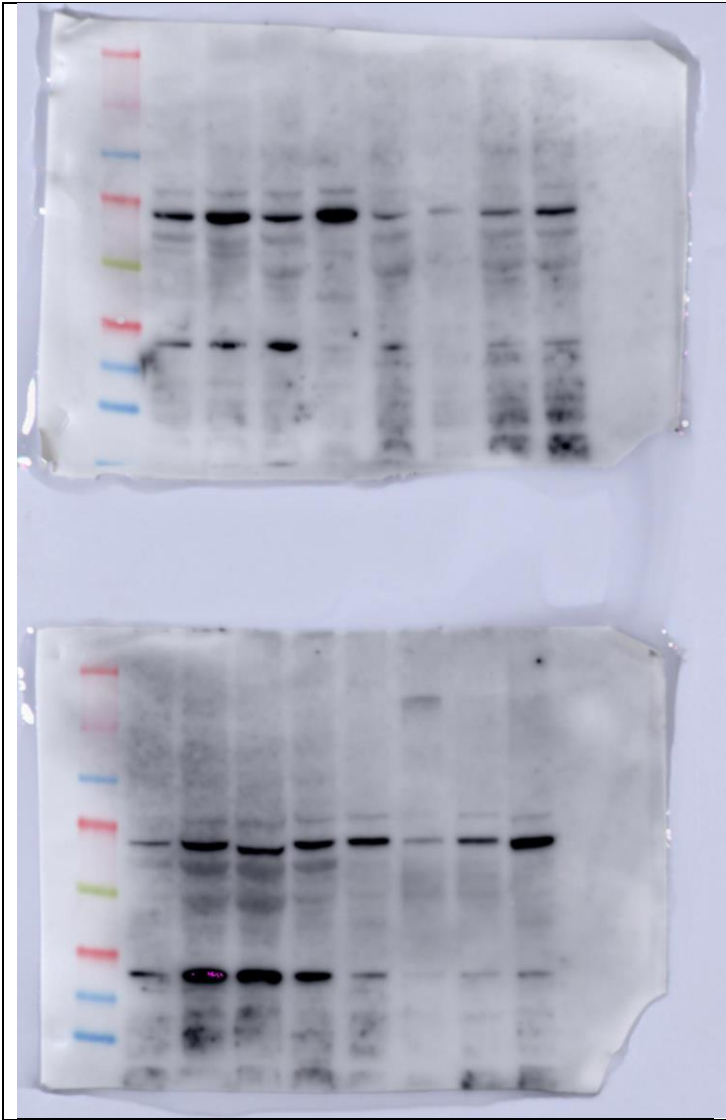

Actin loading Paxillin

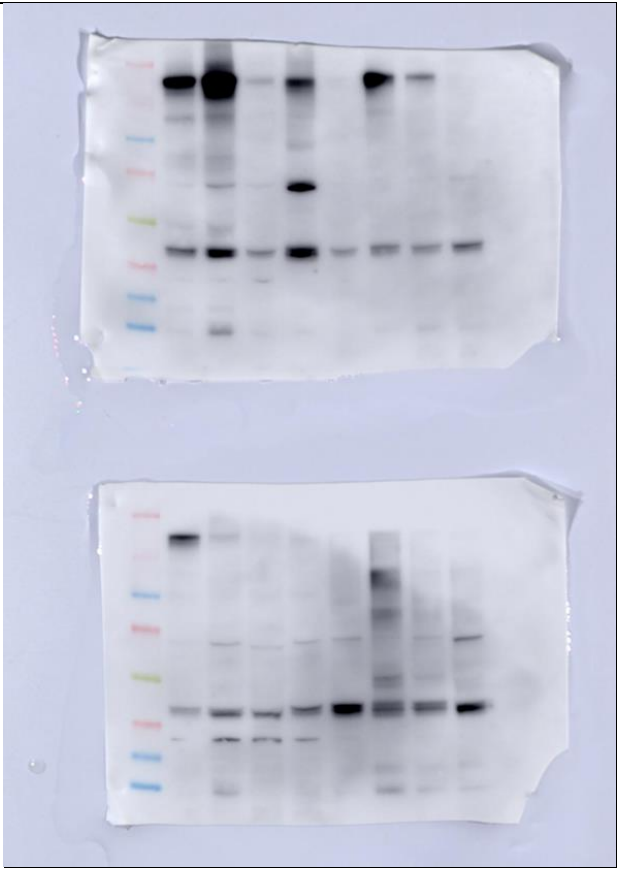

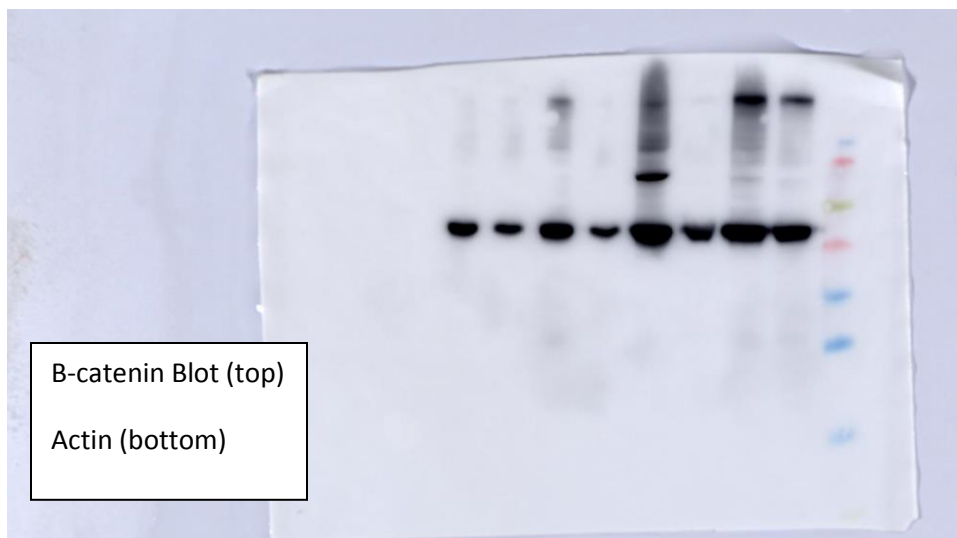

B-catenin Blot (top)

Actin (bottom)

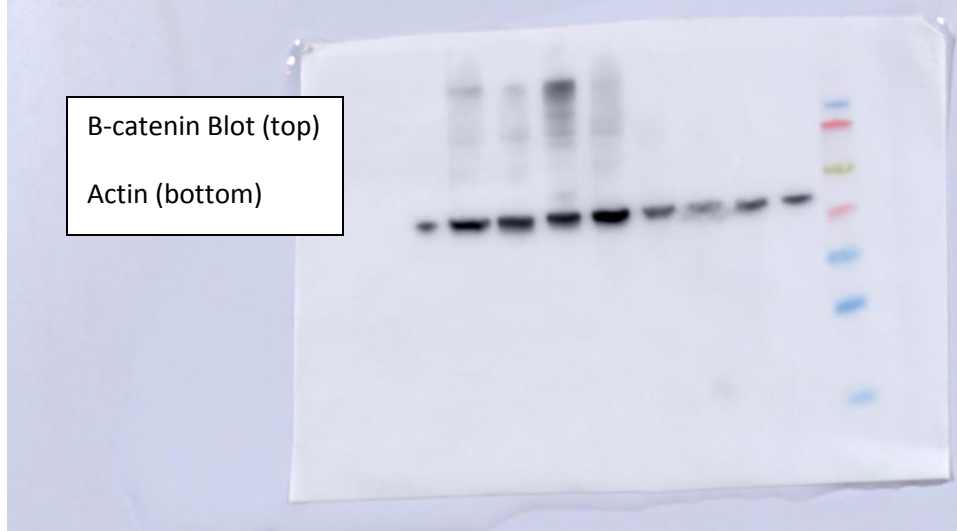

B-catenin Blot (top)

Actin (bottom)

Table S3: Differentially expressed genes by RNAseq comparing gemcitabine (GEM) to combination therapy (Comb)

| gene_id             | Gem        | Comb       | gene_name | gene_chr | gene_start | gene_end  | gene_strand | gene_length | gene_biotype   | gene_description                                                                                    |
|---------------------|------------|------------|-----------|----------|------------|-----------|-------------|-------------|----------------|-----------------------------------------------------------------------------------------------------|
| ENSMUSG000000057003 | 85.022694  | 0.04673662 | Myh4      | 11       | 67238029   | 67260446  | +           | 6016        | protein_coding | myosin, heavy polypeptide 4, skeletal muscle [Source:MGI Symbol;Acc:MGI:13397]                      |
| ENSMUSG000000005716 | 113.471935 | 0.10803747 | Pvalb     | 15       | 78191114   | 78206400  | -           | 1041        | protein_coding | parvalbumin [Source:MGI Symbol;Acc:MGI:97821]                                                       |
| ENSMUSG000000030399 | 37.3563199 | 0.13513029 | Ckm       | 7        | 19404776   | 19422841  | +           | 2913        | protein_coding | creatine kinase, muscle [Source:MGI Symbol;Acc:MGI:88413]                                           |
| ENSMUSG000000030730 | 46.7747322 | 0.29111392 | Atp2a1    | 7        | 126445858  | 126463108 | -           | 3477        | protein_coding | ATPase, Ca++ transporting, cardiac muscle, fast twitch 1 [Source:MGI Symbol;Acc:MGI:109550]         |
| ENSMUSG000000031972 | 253.825089 | 2.26984199 | Acta1     | 8        | 123891769  | 123894751 | -           | 1536        | protein_coding | actin, alpha 1, skeletal muscle [Source:MGI Symbol;Acc:MGI:87902]                                   |
| ENSMUSG000000006457 | 36.3318056 | 0.17487959 | Actn3     | 19       | 4861223    | 4877909   | -           | 2894        | protein_coding | actinin alpha 3 [Source:MGI Symbol;Acc:MGI:99678]                                                   |
| ENSMUSG000000051985 | 5.31028082 | 0          | Igfn1     | 1        | 135953578  | 136006342 | -           | 8996        | protein_coding | immunoglobulin-like and fibronectin type III domain containing 1 [Source:MGI Symbol;Acc:MGI:109550] |
| ENSMUSG000000061723 | 212.479406 | 2.16692596 | Tnnt3     | 7        | 142498836  | 142516009 | +           | 1583        | protein_coding | troponin T3, skeletal, fast [Source:MGI Symbol;Acc:MGI:109550]                                      |
| ENSMUSG000000061816 | 62.7846096 | 0.46093037 | My1       | 1        | 66924295   | 66945404  | -           | 2074        | protein_coding | myosin, light polypeptide 1 [Source:MGI Symbol;Acc:MGI:97269]                                       |
| ENSMUSG000000019787 | 3.4668772  | 0          | Trdn      | 10       | 33080554   | 33476709  | +           | 9352        | protein_coding | triadin [Source:MGI Symbol;Acc:MGI:1924007]                                                         |
| ENSMUSG000000051747 | 1.19224076 | 0.01636584 | Ttn       | 2        | 76703980   | 76982547  | -           | 116825      | protein_coding | titin [Source:MGI Symbol;Acc:MGI:98864]                                                             |
| ENSMUSG000000056328 | 7.5194847  | 0.05310893 | Myh1      | 11       | 67200052   | 67224575  | +           | 6353        | protein_coding | myosin, heavy polypeptide 1, skeletal muscle, adult [Source:MGI Symbol;Acc:MGI:109550]              |
| ENSMUSG000000030672 | 106.707578 | 1.85326993 | My1pf     | 7        | 127208890  | 127214298 | +           | 1062        | protein_coding | myosin light chain, phosphorylatable, fast skeletal muscle [Source:MGI Symbol;Acc:MGI:109550]       |
| ENSMUSG000000028834 | 7.77887247 | 0          | Trim63    | 4        | 134315120  | 134329629 | +           | 2842        | protein_coding | tripartite motif-containing 63 [Source:MGI Symbol;Acc:MGI:2447992]                                  |
| ENSMUSG000000019577 | 6.26289273 | 0          | Pdk4      | 6        | 5483351    | 5496309   | -           | 3511        | protein_coding | pyruvate dehydrogenase kinase, isoenzyme 4 [Source:MGI Symbol;Acc:MGI:13514]                        |
| ENSMUSG000000007877 | 60.6450405 | 0.88977064 | Tcap      | 11       | 98383811   | 98384953  | +           | 948         | protein_coding | titin-cap [Source:MGI Symbol;Acc:MGI:1330233]                                                       |
| ENSMUSG000000031636 | 5.44676786 | 0.04370197 | Pdlim3    | 8        | 45885461   | 45919548  | +           | 5147        | protein_coding | PDZ and LIM domain 3 [Source:MGI Symbol;Acc:MGI:1859274]                                            |
| ENSMUSG000000047419 | 1.73057188 | 0.00474544 | Cmya5     | 13       | 93040713   | 93144724  | -           | 11850       | protein_coding | cardiomyopathy associated 5 [Source:MGI Symbol;Acc:MGI:1923719]                                     |
| ENSMUSG000000027559 | 17.3567828 | 0.37292726 | Car3      | 3        | 14863512   | 14872523  | +           | 2865        | protein_coding | carbonic anhydrase 3 [Source:MGI Symbol;Acc:MGI:88270]                                              |
| ENSMUSG000000061462 | 0.90243677 | 0.00972965 | Obscn     | 11       | 58994256   | 59136402  | -           | 28898       | protein_coding | obscurin, cytoskeletal calmodulin and titin-interacting RhoGEF [Source:MGI Symbol;Acc:MGI:109550]   |
| ENSMUSG000000021798 | 3.83480532 | 0.03684423 | Ldb3      | 14       | 34526603   | 34588682  | -           | 6105        | protein_coding | LIM domain binding 3 [Source:MGI Symbol;Acc:MGI:1344412]                                            |
| ENSMUSG000000061780 | 28.3491187 | 0.36594472 | Cfd       | 10       | 79890853   | 79892655  | +           | 922         | protein_coding | complement factor D (adipsin) [Source:MGI Symbol;Acc:MGI:87931]                                     |
| ENSMUSG000000064907 | 136.818577 | 0          | Gm25405   | 7        | 104423274  | 104423380 | +           | 107         | snRNA          | predicted gene, 25405 [Source:MGI Symbol;Acc:MGI:5455182]                                           |
| ENSMUSG000000079243 | 2.87263107 | 0.00963067 | Xirp1     | 9        | 120013755  | 120023598 | -           | 5839        | protein_coding | xin actin-binding repeat containing 1 [Source:MGI Symbol;Acc:MGI:1333878]                           |
| ENSMUSG000000032648 | 21.8807545 | 0.62908831 | Pygm      | 19       | 6384399    | 6398459   | +           | 3218        | protein_coding | muscle glycogen phosphorylase [Source:MGI Symbol;Acc:MGI:97830]                                     |
| ENSMUSG000000028435 | 0.25924368 | 15.6802009 | Aqp3      | 4        | 41092722   | 41098183  | -           | 1829        | protein_coding | aquaporin 3 [Source:MGI Symbol;Acc:MGI:1333777]                                                     |
| ENSMUSG000000027022 | 2.99836122 | 0.06572077 | Xirp2     | 2        | 67446002   | 67526614  | +           | 11979       | protein_coding | xin actin-binding repeat containing 2 [Source:MGI Symbol;Acc:MGI:2685198]                           |
| ENSMUSG000000049134 | 4.12207217 | 0.06126766 | Nrap      | 19       | 56320035   | 56390037  | -           | 5507        | protein_coding | nebulin-related anchoring protein [Source:MGI Symbol;Acc:MGI:1098765]                               |
| ENSMUSG000000068697 | 11.0268997 | 0.14860863 | Myoz1     | 14       | 20649107   | 20656540  | -           | 1892        | protein_coding | myozenin 1 [Source:MGI Symbol;Acc:MGI:1929471]                                                      |

|                     |            |            |             |    |           |           |   |       |                |                                                                                 |
|---------------------|------------|------------|-------------|----|-----------|-----------|---|-------|----------------|---------------------------------------------------------------------------------|
| ENSMUSG00000016349  | 6.79723179 | 0.02698345 | Eef1a2      | 2  | 181147653 | 181157014 | - | 2084  | protein_coding | eukaryotic translation elongation factor 1 alpha 2 [Source:MGI Symbol;Acc:MGI:1 |
| ENSMUSG00000030785  | 27.6300864 | 0.33078532 | Cox6a2      | 7  | 128205435 | 128206387 | - | 680   | protein_coding | cytochrome c oxidase subunit 6A2 [Source:MGI Symbol;Acc:MGI:104649]             |
| ENSMUSG000000031097 | 104.127596 | 4.28231098 | Tnni2       | 7  | 142441808 | 142444410 | + | 1497  | protein_coding | troponin I, skeletal, fast 2 [Source:MGI Symbol;Acc:MGI:105070]                 |
| ENSMUSG000000026950 | 1.88854636 | 0.06134872 | Neb         | 2  | 52136647  | 52378474  | - | 26582 | protein_coding | nebulin [Source:MGI Symbol;Acc:MGI:97292]                                       |
| ENSMUSG000000024471 | 6.84189426 | 0.07636963 | Myot        | 18 | 44334074  | 44355724  | + | 2209  | protein_coding | myotilin [Source:MGI Symbol;Acc:MGI:1889800]                                    |
| ENSMUSG000000030592 | 1.89441208 | 0.06952581 | Ryr1        | 7  | 29003344  | 29125179  | - | 21838 | protein_coding | ryanodine receptor 1, skeletal muscle [Source:MGI Symbol;Acc:MGI:99659]         |
| ENSMUSG000000029683 | 6.65883    | 0.0569165  | Lmod2       | 6  | 24597762  | 24605414  | + | 1976  | protein_coding | leiomodin 2 (cardiac) [Source:MGI Symbol;Acc:MGI:2135672]                       |
| ENSMUSG000000070385 | 4.91129038 | 0.09509612 | Ampd1       | 3  | 103074014 | 103099720 | + | 3548  | protein_coding | adenosine monophosphate deaminase 1 [Source:MGI Symbol;Acc:MGI:88015]           |
| ENSMUSG000000026208 | 29.6663697 | 1.52792155 | Des         | 1  | 75360329  | 75368579  | + | 3754  | protein_coding | desmin [Source:MGI Symbol;Acc:MGI:94885]                                        |
| ENSMUSG000000031927 | 0.43420942 | 20.3237087 | 1700012B09f | 9  | 14756587  | 14771030  | - | 819   | protein_coding | RIKEN cDNA 1700012B09 gene [Source:MGI Symbol;Acc:MGI:1916575]                  |
| ENSMUSG000000031461 | 1.58668156 | 0.02540766 | Myom2       | 8  | 15057653  | 15133541  | + | 8853  | protein_coding | myomesin 2 [Source:MGI Symbol;Acc:MGI:1328358]                                  |
| ENSMUSG000000038403 | 4.17926568 | 0          | Hfe2        | 3  | 96525172  | 96529210  | + | 2028  | protein_coding | hemochromatosis type 2 (juvenile) [Source:MGI Symbol;Acc:MGI:1916835]           |
| ENSMUSG000000006221 | 6.61404914 | 0.18277412 | Hspb7       | 4  | 141420779 | 141425311 | + | 2769  | protein_coding | heat shock protein family, member 7 (cardiovascular) [Source:MGI Symbol;Acc:M   |
| ENSMUSG000000035923 | 6.28830128 | 0          | Myf6        | 10 | 107492853 | 107494737 | - | 1263  | protein_coding | myogenic factor 6 [Source:MGI Symbol;Acc:MGI:97253]                             |
| ENSMUSG000000076490 | 3.56092306 | 65.6182685 | Trbc1       | 6  | 41538218  | 41539881  | + | 749   | TR_C_gene      | T cell receptor beta, constant region 1 [Source:MGI Symbol;Acc:MGI:4439726]     |
| ENSMUSG000000040694 | 4.63913478 | 0          | Apobec2     | 17 | 48419231  | 48432930  | - | 1597  | protein_coding | apolipoprotein B mRNA editing enzyme, catalytic polypeptide 2 [Source:MGI Sym   |
| ENSMUSG000000075307 | 5.69494242 | 0.15564829 | Klhl41      | 2  | 69670120  | 69684230  | + | 2529  | protein_coding | kelch-like 41 [Source:MGI Symbol;Acc:MGI:2683854]                               |
| ENSMUSG000000007097 | 3.41907529 | 0.15979967 | Atp1a2      | 1  | 172271709 | 172298064 | - | 7038  | protein_coding | ATPase, Na+/K+ transporting, alpha 2 polypeptide [Source:MGI Symbol;Acc:MGI:8   |
| ENSMUSG000000115801 | 0.00572671 | 0.16541574 | AC160336.1  | 14 | 44544055  | 44637201  | - | 93147 | lincRNA        | novel transcript                                                                |
| ENSMUSG000000038670 | 16.9552706 | 1.0900984  | Mybpc2      | 7  | 44501699  | 44524656  | - | 3611  | protein_coding | myosin binding protein C, fast-type [Source:MGI Symbol;Acc:MGI:1336170]         |
| ENSMUSG000000007122 | 7.47325379 | 0.25940622 | Casq1       | 1  | 172209894 | 172219868 | - | 1951  | protein_coding | calsequestrin 1 [Source:MGI Symbol;Acc:MGI:1309468]                             |
| ENSMUSG000000042895 | 4.19801364 | 0.13213647 | Abra        | 15 | 41864076  | 41869720  | - | 2979  | protein_coding | actin-binding Rho activating protein [Source:MGI Symbol;Acc:MGI:2444891]        |
| ENSMUSG000000040809 | 0.54475722 | 11.5430295 | Chil3       | 3  | 106147554 | 106167564 | - | 1632  | protein_coding | chitinase-like 3 [Source:MGI Symbol;Acc:MGI:1330860]                            |
| ENSMUSG000000020061 | 2.18644154 | 0.06210902 | Mybpc1      | 10 | 88518279  | 88605152  | - | 4527  | protein_coding | myosin binding protein C, slow-type [Source:MGI Symbol;Acc:MGI:1336213]         |
| ENSMUSG000000074001 | 4.14721213 | 0.13490645 | Klhl40      | 9  | 121777607 | 121783818 | + | 2501  | protein_coding | kelch-like 40 [Source:MGI Symbol;Acc:MGI:1919580]                               |
| ENSMUSG000000069045 | 1.01461688 | 0          | Ddx3y       | Y  | 1260771   | 1286629   | - | 5199  | protein_coding | DEAD (Asp-Glu-Ala-Asp) box polypeptide 3, Y-linked [Source:MGI Symbol;Acc:MG    |
| ENSMUSG000000030996 | 2.65858591 | 0.06005714 | Art1        | 7  | 102101743 | 102113933 | + | 2809  | protein_coding | ADP-ribosyltransferase 1 [Source:MGI Symbol;Acc:MGI:107511]                     |
| ENSMUSG000000033196 | 0.7058869  | 0          | Myh2        | 11 | 67171027  | 67197517  | + | 7137  | protein_coding | myosin, heavy polypeptide 2, skeletal muscle, adult [Source:MGI Symbol;Acc:MGI  |
| ENSMUSG000000044938 | 0.88530179 | 0.0086593  | Klhl31      | 9  | 77636500  | 77660127  | + | 6494  | protein_coding | kelch-like 31 [Source:MGI Symbol;Acc:MGI:3045305]                               |
| ENSMUSG000000027470 | 5.26215911 | 0.36205916 | Mylk2       | 2  | 152911352 | 152923068 | + | 2951  | protein_coding | myosin, light polypeptide kinase 2, skeletal muscle [Source:MGI Symbol;Acc:MGI: |

|                    |            |            |         |    |           |           |   |      |                     |                                                                                                  |
|--------------------|------------|------------|---------|----|-----------|-----------|---|------|---------------------|--------------------------------------------------------------------------------------------------|
| ENSMUSG00000020475 | 27.376904  | 2.2091734  | Pgam2   | 11 | 5801640   | 5803733   | - | 840  | protein_coding      | phosphoglycerate mutase 2 [Source:MGI Symbol;Acc:MGI:1933118]                                    |
| ENSMUSG00000038239 | 3.00274598 | 0.10957425 | Hrc     | 7  | 45335290  | 45338974  | + | 2566 | protein_coding      | histidine rich calcium binding protein [Source:MGI Symbol;Acc:MGI:96226]                         |
| ENSMUSG00000047746 | 0.78424502 | 0          | Fbxo40  | 16 | 36963460  | 36990467  | - | 5517 | protein_coding      | F-box protein 40 [Source:MGI Symbol;Acc:MGI:2443753]                                             |
| ENSMUSG00000042717 | 0.71480908 | 0.00807373 | Ppp1r3a | 6  | 14713977  | 14755274  | - | 6965 | protein_coding      | protein phosphatase 1, regulatory subunit 3A [Source:MGI Symbol;Acc:MGI:21535]                   |
| ENSMUSG00000024617 | 0.96863891 | 0.03766477 | Camk2a  | 18 | 60925618  | 60988152  | + | 7465 | protein_coding      | calcium/calmodulin-dependent protein kinase II alpha [Source:MGI Symbol;Acc:MGI:21535]           |
| ENSMUSG00000057000 | 0          | 1.30990119 | Nxf3    | X  | 136072099 | 136085255 | - | 3048 | protein_coding      | nuclear RNA export factor 3 [Source:MGI Symbol;Acc:MGI:2685230]                                  |
| ENSMUSG00000020216 | 5.69130308 | 0.25311405 | Jsrp1   | 10 | 80808496  | 80813498  | - | 1333 | protein_coding      | junctional sarcoplasmic reticulum protein 1 [Source:MGI Symbol;Acc:MGI:191670]                   |
| ENSMUSG00000024028 | 8.01763235 | 77.1284885 | Tff2    | 17 | 31141049  | 31144282  | - | 584  | protein_coding      | trefoil factor 2 (spasmolytic protein 1) [Source:MGI Symbol;Acc:MGI:1306805]                     |
| ENSMUSG00000025129 | 7.61049158 | 0.21880741 | Ppp1r27 | 11 | 120549979 | 120551132 | - | 771  | protein_coding      | protein phosphatase 1, regulatory subunit 27 [Source:MGI Symbol;Acc:MGI:19159]                   |
| ENSMUSG00000025934 | 0.62762453 | 6.33015281 | Gsta3   | 1  | 21240589  | 21265661  | + | 4344 | protein_coding      | glutathione S-transferase, alpha 3 [Source:MGI Symbol;Acc:MGI:95856]                             |
| ENSMUSG00000005628 | 6.76577685 | 0.52401635 | Tmod4   | 3  | 95124476  | 95129209  | + | 1717 | protein_coding      | tropomodulin 4 [Source:MGI Symbol;Acc:MGI:1355285]                                               |
| ENSMUSG00000025537 | 1.40229163 | 0.08639346 | Phkg1   | 5  | 129863421 | 129898549 | - | 6509 | protein_coding      | phosphorylase kinase gamma 1 [Source:MGI Symbol;Acc:MGI:97579]                                   |
| ENSMUSG00000021622 | 3.31048158 | 0.07568439 | Ckmt2   | 13 | 91853387  | 91876885  | - | 1486 | protein_coding      | creatine kinase, mitochondrial 2 [Source:MGI Symbol;Acc:MGI:1923972]                             |
| ENSMUSG00000027887 | 0.82600977 | 0          | Sypl2   | 3  | 108211472 | 108226648 | - | 4377 | protein_coding      | synaptophysin-like 2 [Source:MGI Symbol;Acc:MGI:1328311]                                         |
| ENSMUSG00000026580 | 0.37605901 | 4.03943372 | Selp    | 1  | 164115264 | 164150026 | + | 4413 | protein_coding      | selectin, platelet [Source:MGI Symbol;Acc:MGI:98280]                                             |
| ENSMUSG00000038132 | 1.00169166 | 0          | Rbm24   | 13 | 46418434  | 46431095  | + | 3491 | protein_coding      | RNA binding motif protein 24 [Source:MGI Symbol;Acc:MGI:3610364]                                 |
| ENSMUSG00000031382 | 2.51900945 | 0.13826292 | Asb11   | X  | 164436994 | 164459170 | + | 2847 | protein_coding      | ankyrin repeat and SOCS box-containing 11 [Source:MGI Symbol;Acc:MGI:191610]                     |
| ENSMUSG00000052374 | 1.23380693 | 0.02963558 | Actn2   | 13 | 12269426  | 12340760  | - | 3795 | protein_coding      | actinin alpha 2 [Source:MGI Symbol;Acc:MGI:109192]                                               |
| ENSMUSG00000040666 | 4.75666741 | 0.28654015 | Sh3bgr  | 16 | 96200450  | 96228935  | + | 1570 | protein_coding      | SH3-binding domain glutamic acid-rich protein [Source:MGI Symbol;Acc:MGI:1354]                   |
| ENSMUSG00000041476 | 1.40683852 | 0          | Smpx    | X  | 157698910 | 157752591 | + | 2275 | protein_coding      | small muscle protein, X-linked [Source:MGI Symbol;Acc:MGI:1913356]                               |
| ENSMUSG00000004654 | 0          | 0.8869638  | Ghrhr   | 6  | 55376295  | 55388530  | + | 3487 | protein_coding      | growth hormone releasing hormone receptor [Source:MGI Symbol;Acc:MGI:95710]                      |
| ENSMUSG00000044951 | 0.7862528  | 0.043881   | Myk4    | 13 | 32700834  | 32783954  | - | 7689 | protein_coding      | myosin light chain kinase family, member 4 [Source:MGI Symbol;Acc:MGI:364375]                    |
| ENSMUSG00000043102 | 0.60747782 | 5.57147809 | Qrfp    | 2  | 31806166  | 31810580  | - | 2927 | protein_coding      | pyroglutamylated RFamide peptide [Source:MGI Symbol;Acc:MGI:3630329]                             |
| ENSMUSG00000079588 | 1.30934284 | 0.02070453 | Tmem182 | 1  | 40805601  | 40856887  | + | 2716 | protein_coding      | transmembrane protein 182 [Source:MGI Symbol;Acc:MGI:1923725]                                    |
| ENSMUSG00000000031 | 7.73395817 | 0.98294338 | H19     | 7  | 142575529 | 142578143 | - | 2460 | lincRNA             | H19, imprinted maternally expressed transcript [Source:MGI Symbol;Acc:MGI:958]                   |
| ENSMUSG00000029685 | 0.63263067 | 0          | Asb15   | 6  | 24528144  | 24573164  | + | 4497 | protein_coding      | ankyrin repeat and SOCS box-containing 15 [Source:MGI Symbol;Acc:MGI:192616]                     |
| ENSMUSG00000026407 | 0.50673234 | 0.00858527 | Cacna1s | 1  | 136052750 | 136119822 | + | 6550 | protein_coding      | calcium channel, voltage-dependent, L type, alpha 1S subunit [Source:MGI Symbol;Acc:MGI:1913356] |
| ENSMUSG00000020722 | 4.41318775 | 0.27013693 | Cacng1  | 11 | 107703218 | 107716522 | - | 1249 | protein_coding      | calcium channel, voltage-dependent, gamma subunit 1 [Source:MGI Symbol;Acc:MGI:1913356]          |
| ENSMUSG00000025172 | 3.87946381 | 0.1533641  | Ankrd2  | 19 | 42036038  | 42045110  | + | 1100 | protein_coding      | ankyrin repeat domain 2 (stretch responsive muscle) [Source:MGI Symbol;Acc:MGI:1913356]          |
| ENSMUSG00000109724 | 0.12053664 | 1.71543231 | Gm18194 | 7  | 12795723  | 12799164  | - | 3442 | transcribed_process | predicted gene, 18194 [Source:MGI Symbol;Acc:MGI:5010379]                                        |



|                     |            |            |             |   |    |           |           |   |  |       |                |                                                                                    |
|---------------------|------------|------------|-------------|---|----|-----------|-----------|---|--|-------|----------------|------------------------------------------------------------------------------------|
| ENSMUSG00000054863  | 0.65221002 | 5.35649271 | Fam19a5     |   | 15 | 87544299  | 87759364  | + |  | 2908  | protein_coding | family with sequence similarity 19, member A5 [Source:MGI Symbol;Acc:MGI:214       |
| ENSMUSG00000063388  | 3.04318168 | 0.09166015 | BC023105    |   | 18 | 60441753  | 60442983  | + |  | 1227  | pseudogene     | cDNA sequence BC023105 [Source:MGI Symbol;Acc:MGI:2384767]                         |
| ENSMUSG00000021795  | 0.90731265 | 7.11934317 | Sftpd       |   | 14 | 41172214  | 41185149  | - |  | 2417  | protein_coding | surfactant associated protein D [Source:MGI Symbol;Acc:MGI:109515]                 |
| ENSMUSG00000002500  | 3.24666022 | 0.20535668 | Rpl3l       |   | 17 | 24727820  | 24736143  | + |  | 1643  | protein_coding | ribosomal protein L3-like [Source:MGI Symbol;Acc:MGI:1913461]                      |
| ENSMUSG000000062077 | 2.55899327 | 0.07831964 | Trim54      |   | 5  | 31116712  | 31137630  | + |  | 1436  | protein_coding | tripartite motif-containing 54 [Source:MGI Symbol;Acc:MGI:1889623]                 |
| ENSMUSG000000097767 | 0.15306898 | 1.3070523  | Miat        |   | 5  | 112213228 | 112229395 | - |  | 9293  | lincRNA        | myocardial infarction associated transcript (non-protein coding) [Source:MGI Sym   |
| ENSMUSG000000071540 | 0.46802975 | 0          | 3425401B19f |   | 14 | 32659119  | 32685293  | - |  | 5572  | protein_coding | RIKEN cDNA 3425401B19 gene [Source:MGI Symbol;Acc:MGI:3588196]                     |
| ENSMUSG000000031397 | 2.08510068 | 0.1364339  | Tktl1       | X |    | 74177259  | 74208500  | + |  | 2473  | protein_coding | transketolase-like 1 [Source:MGI Symbol;Acc:MGI:1933244]                           |
| ENSMUSG000000018566 | 2.31761463 | 0.24252518 | Slc2a4      |   | 11 | 69942539  | 69948188  | - |  | 3478  | protein_coding | solute carrier family 2 (facilitated glucose transporter), member 4 [Source:MGI Sy |
| ENSMUSG000000095918 | 0.05407809 | 2.77062888 | Gm5861      |   | 5  | 11183072  | 11187810  | + |  | 1096  | protein_coding | predicted gene 5861 [Source:MGI Symbol;Acc:MGI:3644254]                            |
| ENSMUSG000000044086 | 1.15060596 | 0          | Lmod3       |   | 6  | 97238534  | 97252759  | - |  | 2215  | protein_coding | leiomodlin 3 (fetal) [Source:MGI Symbol;Acc:MGI:2444169]                           |
| ENSMUSG000000078815 | 1.22916187 | 0          | Cacng6      |   | 7  | 3424195   | 3435667   | + |  | 1977  | protein_coding | calcium channel, voltage-dependent, gamma subunit 6 [Source:MGI Symbol;Acc:M       |
| ENSMUSG000000002831 | 4.53473377 | 0.71058436 | Plin4       |   | 17 | 56100591  | 56109803  | - |  | 5777  | protein_coding | perilipin 4 [Source:MGI Symbol;Acc:MGI:1929709]                                    |
| ENSMUSG000000022215 | 2.44158953 | 0          | Fitm1       |   | 14 | 55575617  | 55576954  | + |  | 971   | protein_coding | fat storage-inducing transmembrane protein 1 [Source:MGI Symbol;Acc:MGI:1915       |
| ENSMUSG000000079278 | 0.9331909  | 0          | Tmem233     |   | 5  | 116038755 | 116083244 | - |  | 2477  | protein_coding | transmembrane protein 233 [Source:MGI Symbol;Acc:MGI:3651514]                      |
| ENSMUSG000000056423 | 3.26515084 | 21.7526012 | Uts2b       |   | 16 | 27353322  | 27370239  | - |  | 835   | protein_coding | urotensin 2B [Source:MGI Symbol;Acc:MGI:2677064]                                   |
| ENSMUSG000000010796 | 0.02095072 | 0.95412097 | Asz1        |   | 6  | 18050964  | 18109061  | - |  | 2829  | protein_coding | ankyrin repeat, SAM and basic leucine zipper domain containing 1 [Source:MGI Sy    |
| ENSMUSG000000027513 | 0.79510089 | 0.01639939 | Pck1        |   | 2  | 173153048 | 173159273 | + |  | 3429  | protein_coding | phosphoenolpyruvate carboxykinase 1, cytosolic [Source:MGI Symbol;Acc:MGI:97       |
| ENSMUSG000000039376 | 0.58898271 | 0.01214809 | Synpo2l     |   | 14 | 20658946  | 20668354  | - |  | 4629  | protein_coding | synaptopodin 2-like [Source:MGI Symbol;Acc:MGI:1916010]                            |
| ENSMUSG000000022949 | 0.18171564 | 1.76717452 | Clic6       |   | 16 | 92485736  | 92541243  | + |  | 3914  | protein_coding | chloride intracellular channel 6 [Source:MGI Symbol;Acc:MGI:2146607]               |
| ENSMUSG000000025488 | 9.54898885 | 0.46861254 | Cox8b       |   | 7  | 140898945 | 140900446 | - |  | 360   | protein_coding | cytochrome c oxidase subunit 8B [Source:MGI Symbol;Acc:MGI:105958]                 |
| ENSMUSG000000049641 | 1.32907556 | 0          | Vgll2       |   | 10 | 52022502  | 52028471  | + |  | 1650  | protein_coding | vestigial like family member 2 [Source:MGI Symbol;Acc:MGI:2447460]                 |
| ENSMUSG000000056673 | 0.14461716 | 0          | Kdm5d       | Y |    | 897788    | 956786    | + |  | 15164 | protein_coding | lysine (K)-specific demethylase 5D [Source:MGI Symbol;Acc:MGI:99780]               |
| ENSMUSG000000031519 | 5.33844345 | 0.73228655 | Asb5        |   | 8  | 54529580  | 54587842  | + |  | 1843  | protein_coding | ankyrin repeat and SOCs box-containing 5 [Source:MGI Symbol;Acc:MGI:1923544]       |
| ENSMUSG000000043441 | 0.06911099 | 0.9442193  | Gpr149      |   | 3  | 62529077  | 62605140  | - |  | 4288  | protein_coding | G protein-coupled receptor 149 [Source:MGI Symbol;Acc:MGI:2443628]                 |
| ENSMUSG000000038763 | 0.32186742 | 0          | Alpk3       |   | 7  | 81057600  | 81105612  | + |  | 6445  | protein_coding | alpha-kinase 3 [Source:MGI Symbol;Acc:MGI:2151224]                                 |
| ENSMUSG000000022032 | 0.17509479 | 1.35669214 | Scara5      |   | 14 | 65666403  | 65764826  | + |  | 6093  | protein_coding | scavenger receptor class A, member 5 [Source:MGI Symbol;Acc:MGI:1918395]           |
| ENSMUSG000000029121 | 1.89265638 | 0.30327465 | Crmp1       |   | 5  | 37241940  | 37292133  | + |  | 7046  | protein_coding | collapsin response mediator protein 1 [Source:MGI Symbol;Acc:MGI:107793]           |
| ENSMUSG000000035681 | 0.48989991 | 0.03151219 | Kcnc2       |   | 10 | 112271121 | 112467024 | + |  | 7138  | protein_coding | potassium voltage gated channel, Shaw-related subfamily, member 2 [Source:MG       |
| ENSMUSG000000037621 | 0.42554948 | 3.20757526 | Atoh8       |   | 6  | 72206177  | 72235577  | - |  | 2507  | protein_coding | atonal bHLH transcription factor 8 [Source:MGI Symbol;Acc:MGI:1918343]             |

|                     |            |            |             |    |           |           |   |       |                      |                                                                                                                                            |
|---------------------|------------|------------|-------------|----|-----------|-----------|---|-------|----------------------|--------------------------------------------------------------------------------------------------------------------------------------------|
| ENSMUSG00000056468  | 3.56960536 | 0.57004745 | 5730596B20  | 6  | 52177498  | 52180851  | + | 3354  | protein_coding       | RIKEN cDNA 5730596B20 gene [Source:MGI Symbol;Acc:MGI:1924830]                                                                             |
| ENSMUSG00000059654  | 34.3553795 | 171.561954 | Reg1        | 6  | 78422711  | 78428667  | + | 904   | protein_coding       | regenerating islet-derived 1 [Source:MGI Symbol;Acc:MGI:97895]                                                                             |
| ENSMUSG00000032942  | 0.96419422 | 0.05381197 | Ucp3        | 7  | 100472990 | 100486432 | + | 3135  | protein_coding       | uncoupling protein 3 (mitochondrial, proton carrier) [Source:MGI Symbol;Acc:MGI:98251]                                                     |
| ENSMUSG00000001027  | 0.42930676 | 0.02395974 | Scn4a       | 11 | 106318592 | 106353288 | - | 7041  | protein_coding       | sodium channel, voltage-gated, type IV, alpha [Source:MGI Symbol;Acc:MGI:98251]                                                            |
| ENSMUSG00000028341  | 0.60388254 | 0.04696301 | Nr4a3       | 4  | 48045153  | 48086447  | + | 5987  | protein_coding       | nuclear receptor subfamily 4, group A, member 3 [Source:MGI Symbol;Acc:MGI:13100002109]                                                    |
| ENSMUSG00000051910  | 0.12387791 | 0          | Sox6        | 7  | 115470872 | 116038796 | - | 14832 | protein_coding       | SRY (sex determining region Y)-box 6 [Source:MGI Symbol;Acc:MGI:98368]                                                                     |
| ENSMUSG00000055489  | 0.33348616 | 0.01438197 | Ano5        | 7  | 51511029  | 51598709  | + | 7820  | protein_coding       | anoctamin 5 [Source:MGI Symbol;Acc:MGI:3576659]                                                                                            |
| ENSMUSG00000030800  | 0.28802715 | 2.55054773 | Prss8       | 7  | 127925716 | 127930104 | - | 1852  | protein_coding       | protease, serine 8 (prostasin) [Source:MGI Symbol;Acc:MGI:1923810]                                                                         |
| ENSMUSG00000094036  | 0.05397959 | 1.99736492 | Gm6465      | 5  | 11845539  | 11850352  | + | 1098  | protein_coding       | predicted gene 6465 [Source:MGI Symbol;Acc:MGI:3642949]                                                                                    |
| ENSMUSG00000068457  | 0.18160429 | 0          | Uty         | Y  | 1096861   | 1245759   | - | 9791  | protein_coding       | ubiquitously transcribed tetratricopeptide repeat gene, Y chromosome [Source:MGI Symbol;Acc:MGI:1347083]                                   |
| ENSMUSG00000028464  | 36.7557006 | 7.98364986 | Tpm2        | 4  | 43514711  | 43523765  | - | 2909  | protein_coding       | tropomyosin 2, beta [Source:MGI Symbol;Acc:MGI:98810]                                                                                      |
| ENSMUSG00000026535  | 0.41911316 | 3.34683794 | Ifi202b     | 1  | 173962568 | 173982744 | - | 1697  | protein_coding       | interferon activated gene 202B [Source:MGI Symbol;Acc:MGI:1347083]                                                                         |
| ENSMUSG00000052912  | 0.66325928 | 0.01748011 | Smarca5-ps  | 4  | 145464204 | 145467420 | + | 3217  | transcribed_process  | SWI/SNF related, matrix associated, actin dependent regulator of chromatin, subfamily 5, polypeptide 2 [Source:MGI Symbol;Acc:MGI:1916780] |
| ENSMUSG00000028396  | 0.79648656 | 0          | 2310002L09R | 4  | 73939371  | 73950846  | - | 2158  | protein_coding       | RIKEN cDNA 2310002L09 gene [Source:MGI Symbol;Acc:MGI:1916780]                                                                             |
| ENSMUSG00000020067  | 0.77383414 | 0.08694409 | Mypn        | 10 | 63115795  | 63203952  | - | 5821  | protein_coding       | myopalladin [Source:MGI Symbol;Acc:MGI:1916052]                                                                                            |
| ENSMUSG00000044676  | 0.19486959 | 1.25723436 | Zfp612      | 8  | 110079746 | 110092741 | + | 6083  | protein_coding       | zinc finger protein 612 [Source:MGI Symbol;Acc:MGI:2443465]                                                                                |
| ENSMUSG000000101451 | 0.82359722 | 0          | Gm29430     | 6  | 52183110  | 52189925  | + | 2015  | antisense            | predicted gene 29430 [Source:MGI Symbol;Acc:MGI:5580136]                                                                                   |
| ENSMUSG00000036523  | 0.15467011 | 0.92744194 | Greb1       | 12 | 16670615  | 16800886  | - | 9580  | protein_coding       | gene regulated by estrogen in breast cancer protein [Source:MGI Symbol;Acc:MGI:2157521]                                                    |
| ENSMUSG00000046093  | 0.7437839  | 3.68640694 | Hpcal4      | 4  | 123183227 | 123194701 | + | 5339  | protein_coding       | hippocalcin-like 4 [Source:MGI Symbol;Acc:MGI:2157521]                                                                                     |
| ENSMUSG00000027792  | 0.38686571 | 2.05213502 | Bche        | 3  | 73635808  | 73708415  | - | 6741  | protein_coding       | butyrylcholinesterase [Source:MGI Symbol;Acc:MGI:894278]                                                                                   |
| ENSMUSG00000087090  | 0.58614483 | 0.01635646 | Nctc1       | 7  | 142544609 | 142558596 | - | 3438  | processed_transcript | non-coding transcript 1 [Source:MGI Symbol;Acc:MGI:1306816]                                                                                |
| ENSMUSG00000032845  | 0.25895219 | 0.0072261  | Alpk2       | 18 | 65265529  | 65393888  | - | 7782  | protein_coding       | alpha-kinase 2 [Source:MGI Symbol;Acc:MGI:2449492]                                                                                         |
| ENSMUSG00000032523  | 1.85146897 | 0.23564516 | Hhat1       | 9  | 121784016 | 121792507 | - | 2625  | protein_coding       | hedgehog acyltransferase-like [Source:MGI Symbol;Acc:MGI:1922020]                                                                          |
| ENSMUSG00000055030  | 0          | 2.52051258 | Sprr2e      | 3  | 92352143  | 92353449  | + | 647   | protein_coding       | small proline-rich protein 2E [Source:MGI Symbol;Acc:MGI:1330346]                                                                          |
| ENSMUSG00000035296  | 0.60479169 | 0.02942622 | Sgcg        | 14 | 61219115  | 61258490  | - | 3822  | protein_coding       | sarcoglycan, gamma (dystrophin-associated glycoprotein) [Source:MGI Symbol;Acc:MGI:1346089]                                                |
| ENSMUSG00000026527  | 0.4332716  | 0.028028   | Rgs7        | 1  | 175059087 | 175492500 | - | 6019  | protein_coding       | regulator of G protein signaling 7 [Source:MGI Symbol;Acc:MGI:1346089]                                                                     |
| ENSMUSG00000021850  | 0.57440558 | 2.99739926 | ccdc198     | 14 | 49219588  | 49245474  | - | 3921  | protein_coding       | coiled-coil domain containing 198 [Source:MGI Symbol;Acc:MGI:1914332]                                                                      |
| ENSMUSG00000023032  | 0.21848861 | 1.10990022 | Slc4a8      | 15 | 100761747 | 100823968 | + | 13021 | protein_coding       | solute carrier family 4 (anion exchanger), member 8 [Source:MGI Symbol;Acc:MGI:1914332]                                                    |
| ENSMUSG00000021373  | 1.01181549 | 0.12168828 | Cap2        | 13 | 46501848  | 46650281  | + | 4159  | protein_coding       | CAP, adenylate cyclase-associated protein, 2 (yeast) [Source:MGI Symbol;Acc:MGI:1914332]                                                   |
| ENSMUSG00000069917  | 0.08885995 | 2.8664755  | Hba-a2      | 11 | 32296489  | 32297298  | + | 667   | protein_coding       | hemoglobin alpha, adult chain 2 [Source:MGI Symbol;Acc:MGI:96016]                                                                          |

|                     |            |            |         |    |           |           |   |       |                     |                                                                                 |
|---------------------|------------|------------|---------|----|-----------|-----------|---|-------|---------------------|---------------------------------------------------------------------------------|
| ENSMUSG00000039891  | 0.96916111 | 0.15325265 | Txlnb   | 10 | 17796226  | 17845665  | + | 5504  | protein_coding      | taxilin beta [Source:MGI Symbol;Acc:MGI:2671945]                                |
| ENSMUSG00000056900  | 0.60837317 | 0.08140131 | Usp13   | 3  | 32817546  | 32938071  | + | 7599  | protein_coding      | ubiquitin specific peptidase 13 (isopeptidase T-3) [Source:MGI Symbol;Acc:MGI:1 |
| ENSMUSG00000035429  | 0.07077811 | 0.72524702 | Ptprh   | 7  | 4548612   | 4604041   | - | 4187  | protein_coding      | protein tyrosine phosphatase, receptor type, H [Source:MGI Symbol;Acc:MGI:3024  |
| ENSMUSG00000027656  | 8.31745749 | 1.78287099 | Wisp2   | 2  | 163820861 | 163833146 | + | 1924  | protein_coding      | WNT1 inducible signaling pathway protein 2 [Source:MGI Symbol;Acc:MGI:13283     |
| ENSMUSG00000029074  | 0.28259025 | 1.70746652 | Ttll10  | 4  | 156034840 | 156059414 | - | 3985  | protein_coding      | tubulin tyrosine ligase-like family, member 10 [Source:MGI Symbol;Acc:MGI:1921  |
| ENSMUSG00000069355  | 0          | 1.76958581 | Gm5152  | 5  | 10242041  | 10246526  | - | 858   | protein_coding      | predicted gene 5152 [Source:MGI Symbol;Acc:MGI:3643407]                         |
| ENSMUSG00000027895  | 0.40407408 | 0          | Kcnc4   | 3  | 107438303 | 107459552 | - | 3667  | protein_coding      | potassium voltage gated channel, Shaw-related subfamily, member 4 [Source:MG    |
| ENSMUSG00000037600  | 0.79723697 | 4.13655457 | Kdf1    | 4  | 133518963 | 133530790 | + | 2379  | protein_coding      | keratinocyte differentiation factor 1 [Source:MGI Symbol;Acc:MGI:1916323]       |
| ENSMUSG000000072720 | 0.37673695 | 0.04730805 | Myo18b  | 5  | 112688876 | 112896362 | - | 10698 | protein_coding      | myosin XVIIIb [Source:MGI Symbol;Acc:MGI:1921626]                               |
| ENSMUSG00000079560  | 7.53928056 | 1.81398402 | Hoxa3   | 6  | 52169062  | 52213336  | - | 6014  | protein_coding      | homeobox A3 [Source:MGI Symbol;Acc:MGI:96175]                                   |
| ENSMUSG00000034472  | 1.00773225 | 0.10623458 | Rasd2   | 8  | 75213944  | 75224113  | + | 3176  | protein_coding      | RASD family, member 2 [Source:MGI Symbol;Acc:MGI:1922391]                       |
| ENSMUSG00000028392  | 0.85678823 | 4.32749335 | Bspry   | 4  | 62480053  | 62497298  | + | 2352  | protein_coding      | B-box and SPRY domain containing [Source:MGI Symbol;Acc:MGI:2177191]            |
| ENSMUSG00000020396  | 0.02967931 | 0.53502083 | Nefh    | 11 | 4938754   | 4948064   | - | 3994  | protein_coding      | neurofilament, heavy polypeptide [Source:MGI Symbol;Acc:MGI:97309]              |
| ENSMUSG00000022269  | 0.0416219  | 0.75030659 | 11-Mar  | 15 | 26309048  | 26409576  | + | 2848  | protein_coding      | membrane-associated ring finger (C3HC4) 11 [Source:MGI Symbol;Acc:MGI:36083     |
| ENSMUSG00000103472  | 0.02272171 | 0.40959808 | Pcdhga7 | 18 | 37714764  | 37841873  | + | 5217  | protein_coding      | protocadherin gamma subfamily A, 7 [Source:MGI Symbol;Acc:MGI:1935219]          |
| ENSMUSG000000091721 | 2.20079128 | 10.2242736 | Gimd1   | 3  | 132629820 | 132645351 | + | 1562  | protein_coding      | GIMAP family P-loop NTPase domain containing 1 [Source:MGI Symbol;Acc:MGI:3     |
| ENSMUSG00000045871  | 4.01187999 | 0.90185809 | Slitrk6 | 14 | 110748580 | 110755149 | - | 4240  | protein_coding      | SLIT and NTRK-like family, member 6 [Source:MGI Symbol;Acc:MGI:2443198]         |
| ENSMUSG00000022464  | 0.91804569 | 0.1187753  | Slc38a4 | 15 | 96994820  | 97055956  | - | 4261  | protein_coding      | solute carrier family 38, member 4 [Source:MGI Symbol;Acc:MGI:1916604]          |
| ENSMUSG00000039323  | 0          | 0.79159238 | Igfbp2  | 1  | 72824503  | 72852474  | + | 1847  | protein_coding      | insulin-like growth factor binding protein 2 [Source:MGI Symbol;Acc:MGI:96437]  |
| ENSMUSG00000019893  | 0          | 0.18802355 | Ros1    | 10 | 52045721  | 52195244  | - | 7776  | protein_coding      | Ros1 proto-oncogene [Source:MGI Symbol;Acc:MGI:97999]                           |
| ENSMUSG00000034607  | 0.36604994 | 1.98249875 | Pof1b   | X  | 112638431 | 112698651 | - | 3886  | protein_coding      | premature ovarian failure 1B [Source:MGI Symbol;Acc:MGI:1916943]                |
| ENSMUSG00000035540  | 1.38135078 | 6.64439243 | Gc      | 5  | 89417522  | 89457898  | - | 1845  | protein_coding      | vitamin D binding protein [Source:MGI Symbol;Acc:MGI:95669]                     |
| ENSMUSG00000030351  | 0.17805358 | 1.08750488 | Tspan11 | 6  | 127887589 | 127953977 | + | 5326  | protein_coding      | tetraspanin 11 [Source:MGI Symbol;Acc:MGI:1915748]                              |
| ENSMUSG00000028328  | 1.75735975 | 0.32776751 | Tmod1   | 4  | 46038935  | 46116032  | + | 3946  | protein_coding      | tropomodulin 1 [Source:MGI Symbol;Acc:MGI:98775]                                |
| ENSMUSG00000027386  | 14.4134526 | 3.64089296 | Fbln7   | 2  | 128862981 | 128897034 | + | 3228  | protein_coding      | fibulin 7 [Source:MGI Symbol;Acc:MGI:1917620]                                   |
| ENSMUSG00000006542  | 0.4668164  | 0.01527254 | Prkg3   | 1  | 74738922  | 74749221  | - | 3682  | protein_coding      | protein kinase, AMP-activated, gamma 3 non-catalytic subunit [Source:MGI Symb   |
| ENSMUSG000000097580 | 2.41337236 | 0.33672757 | Gm5432  | 12 | 15817003  | 15888155  | + | 1670  | bidirectional_promo | predicted gene 5432 [Source:MGI Symbol;Acc:MGI:3649057]                         |
| ENSMUSG000000041144 | 0.08602693 | 0.43343142 | Dnah7b  | 1  | 46066315  | 46373546  | + | 19980 | protein_coding      | dynein, axonemal, heavy chain 7B [Source:MGI Symbol;Acc:MGI:2684953]            |
| ENSMUSG00000053093  | 0.15821733 | 0          | Myh7    | 14 | 54970684  | 54994626  | - | 8616  | protein_coding      | myosin, heavy polypeptide 7, cardiac muscle, beta [Source:MGI Symbol;Acc:MGI:2  |
| ENSMUSG00000029120  | 0.02663802 | 0.45492273 | Ppp2r2c | 5  | 36868513  | 36955078  | + | 4450  | protein_coding      | protein phosphatase 2, regulatory subunit B, gamma [Source:MGI Symbol;Acc:MG    |

|                    |            |            |            |    |           |           |   |       |                |                                                                              |
|--------------------|------------|------------|------------|----|-----------|-----------|---|-------|----------------|------------------------------------------------------------------------------|
| ENSMUSG00000091712 | 0.3510742  | 0.01959356 | Sec14l5    | 16 | 5147109   | 5187271   | + | 5740  | protein_coding | SEC14-like lipid binding 5 [Source:MGI Symbol;Acc:MGI:3616084]               |
| ENSMUSG00000059430 | 2.36012481 | 10.2571068 | Actg2      | 6  | 83512905  | 83536265  | - | 1557  | protein_coding | actin, gamma 2, smooth muscle, enteric [Source:MGI Symbol;Acc:MGI:104589]    |
| ENSMUSG00000060808 | 2.90192335 | 0.166865   | B9d1os     | 11 | 61504386  | 61505059  | - | 674   | antisense      | B9 protein domain 1, opposite strand [Source:MGI Symbol;Acc:MGI:1920466]     |
| ENSMUSG00000032355 | 0.14624617 | 0          | Mlip       | 9  | 77102081  | 77352969  | - | 8916  | protein_coding | muscular LMNA-interacting protein [Source:MGI Symbol;Acc:MGI:1916892]        |
| ENSMUSG00000073375 | 0.74086982 | 0          | Lrrc30     | 17 | 67630964  | 67632723  | - | 1760  | protein_coding | leucine rich repeat containing 30 [Source:MGI Symbol;Acc:MGI:2685172]        |
| ENSMUSG00000028078 | 0.64588291 | 0.12788819 | Dcl2       | 3  | 86786151  | 86920852  | - | 10553 | protein_coding | doublecortin-like kinase 2 [Source:MGI Symbol;Acc:MGI:1918012]               |
| ENSMUSG00000018569 | 12.8397152 | 49.1321484 | Cldn7      | 11 | 69964779  | 69967885  | + | 1948  | protein_coding | claudin 7 [Source:MGI Symbol;Acc:MGI:1859285]                                |
| ENSMUSG00000016529 | 3.98146837 | 0.72974777 | Il10       | 1  | 131019845 | 131024974 | + | 1310  | protein_coding | interleukin 10 [Source:MGI Symbol;Acc:MGI:96537]                             |
| ENSMUSG00000058427 | 3.43924096 | 13.8136462 | Cxcl2      | 5  | 90903871  | 90905938  | + | 2068  | protein_coding | chemokine (C-X-C motif) ligand 2 [Source:MGI Symbol;Acc:MGI:1340094]         |
| ENSMUSG00000026051 | 0.39425445 | 3.24184284 | 1500015010 | 1  | 43730602  | 43742578  | + | 902   | protein_coding | RIKEN cDNA 1500015010 gene [Source:MGI Symbol;Acc:MGI:1926146]               |
| ENSMUSG00000021898 | 1.60439444 | 0.26473207 | Asb14      | 14 | 26894557  | 26915258  | + | 2549  | protein_coding | ankyrin repeat and SOCS box-containing 14 [Source:MGI Symbol;Acc:MGI:265510] |
| ENSMUSG00000043795 | 5.14948703 | 1.19747668 | Prr33      | 7  | 142491074 | 142506771 | - | 2348  | lincRNA        | proline rich 33 [Source:MGI Symbol;Acc:MGI:3642289]                          |
| ENSMUSG00000030849 | 0.33284624 | 1.42108295 | Fgfr2      | 7  | 130162451 | 133123350 | - | 10328 | protein_coding | fibroblast growth factor receptor 2 [Source:MGI Symbol;Acc:MGI:95523]        |
| ENSMUSG00000018893 | 1.27119755 | 0.07538003 | Mb         | 15 | 77015487  | 77050670  | - | 1492  | protein_coding | myoglobin [Source:MGI Symbol;Acc:MGI:96922]                                  |
| ENSMUSG00000042379 | 3.92869454 | 15.4192967 | Esm1       | 13 | 113209659 | 113218098 | + | 2097  | protein_coding | endothelial cell-specific molecule 1 [Source:MGI Symbol;Acc:MGI:1918940]     |
| ENSMUSG00000026417 | 2.54748779 | 0.57281334 | Pigr       | 1  | 130826684 | 130852249 | + | 4025  | protein_coding | polymeric immunoglobulin receptor [Source:MGI Symbol;Acc:MGI:103080]         |
| ENSMUSG00000030017 | 2.91581691 | 11.5446268 | Reg3g      | 6  | 78466269  | 78468872  | - | 2114  | protein_coding | regenerating islet-derived 3 gamma [Source:MGI Symbol;Acc:MGI:109406]        |
| ENSMUSG00000018845 | 1.89958166 | 0.41302151 | Unc45b     | 11 | 82910550  | 82943403  | + | 4493  | protein_coding | unc-45 myosin chaperone B [Source:MGI Symbol;Acc:MGI:2443377]                |
| ENSMUSG00000096045 | 0          | 0.43169914 | Gm21698    | 5  | 25982030  | 25988650  | - | 2996  | protein_coding | predicted gene, 21698 [Source:MGI Symbol;Acc:MGI:5435053]                    |
| ENSMUSG00000068614 | 0.76925915 | 0          | Actc1      | 2  | 114047282 | 114053548 | - | 1618  | protein_coding | actin, alpha, cardiac muscle 1 [Source:MGI Symbol;Acc:MGI:87905]             |
| ENSMUSG00000053101 | 0.1587401  | 0.89423886 | Gpr141     | 13 | 19749682  | 19824257  | - | 5974  | protein_coding | G protein-coupled receptor 141 [Source:MGI Symbol;Acc:MGI:2672983]           |
| ENSMUSG00000075014 | 19.7565287 | 4.77132767 | Gm10800    | 2  | 98666547  | 98667301  | - | 660   | protein_coding | predicted gene 10800 [Source:MGI Symbol;Acc:MGI:3641657]                     |
| ENSMUSG00000033208 | 3.95396834 | 15.5362109 | S100b      | 10 | 76253853  | 76261159  | + | 1484  | protein_coding | S100 protein, beta polypeptide, neural [Source:MGI Symbol;Acc:MGI:98217]     |
| ENSMUSG00000049670 | 0.16318719 | 1.42441697 | Morn4      | 19 | 42074939  | 42086370  | - | 1816  | protein_coding | MORN repeat containing 4 [Source:MGI Symbol;Acc:MGI:2449568]                 |
| ENSMUSG00000040254 | 2.77212025 | 0.72622676 | Sema3d     | 5  | 12383385  | 12588948  | + | 8595  | protein_coding | sema domain, immunoglobulin domain (Ig), short basic domain, secreted, (sema |
| ENSMUSG00000055027 | 0.86049113 | 0.13606875 | Smyd1      | 6  | 71213940  | 71322233  | - | 4546  | protein_coding | SET and MYND domain containing 1 [Source:MGI Symbol;Acc:MGI:104790]          |
| ENSMUSG00000043003 | 0.51574648 | 2.1824002  | Rasf       | 4  | 73714579  | 73790994  | - | 5746  | protein_coding | RAS and EF hand domain containing [Source:MGI Symbol;Acc:MGI:2448565]        |
| ENSMUSG00000029158 | 0.97242963 | 0          | Yipf7      | 5  | 69516671  | 69542648  | - | 1219  | protein_coding | Yip1 domain family, member 7 [Source:MGI Symbol;Acc:MGI:1922831]             |
| ENSMUSG00000069372 | 0.73856182 | 0          | Ctxn3      | 18 | 57468516  | 57478133  | + | 1605  | protein_coding | cortixin 3 [Source:MGI Symbol;Acc:MGI:3642816]                               |
| ENSMUSG00000026574 | 4.64117988 | 1.04377735 | Dpt        | 1  | 164796644 | 164824266 | + | 1724  | protein_coding | dermatopontin [Source:MGI Symbol;Acc:MGI:1928392]                            |

|                     |            |            |           |    |           |           |   |       |                      |                                                                                                  |
|---------------------|------------|------------|-----------|----|-----------|-----------|---|-------|----------------------|--------------------------------------------------------------------------------------------------|
| ENSMUSG00000086054  | 1.08156179 | 5.13079423 | Hnf1a     | 5  | 114968784 | 114998042 | + | 1370  | antisense            | HNF1 homeobox A, opposite strand 1 [Source:MGI Symbol;Acc:MGI:3652225]                           |
| ENSMUSG00000030554  | 1.51666784 | 0.3756934  | Sym       | 7  | 67730160  | 67759742  | - | 7933  | protein_coding       | synemin, intermediate filament protein [Source:MGI Symbol;Acc:MGI:2661187]                       |
| ENSMUSG00000026579  | 0.32705963 | 1.37745597 | F5        | 1  | 164151838 | 164220277 | + | 7430  | protein_coding       | coagulation factor V [Source:MGI Symbol;Acc:MGI:88382]                                           |
| ENSMUSG00000042784  | 17.9375132 | 63.6641895 | Muc1      | 3  | 89229057  | 89233381  | + | 2346  | protein_coding       | mucin 1, transmembrane [Source:MGI Symbol;Acc:MGI:97231]                                         |
| ENSMUSG00000030616  | 1.16915115 | 4.21519349 | Syt12     | 7  | 90302252  | 90410719  | + | 13941 | protein_coding       | synaptotagmin-like 2 [Source:MGI Symbol;Acc:MGI:1933366]                                         |
| ENSMUSG00000054892  | 0.15689804 | 0.70323963 | Txk       | 5  | 72695978  | 72752777  | - | 10955 | protein_coding       | TXK tyrosine kinase [Source:MGI Symbol;Acc:MGI:102960]                                           |
| ENSMUSG00000069919  | 2.55472353 | 10.9419874 | Hba-a1    | 11 | 32283511  | 32284465  | + | 812   | protein_coding       | hemoglobin alpha, adult chain 1 [Source:MGI Symbol;Acc:MGI:96015]                                |
| ENSMUSG00000051596  | 0.03443904 | 0.50646097 | Otop1     | 5  | 38275972  | 38304217  | + | 3442  | protein_coding       | otopetrin 1 [Source:MGI Symbol;Acc:MGI:2388363]                                                  |
| ENSMUSG00000079440  | 0          | 0.50530749 | Alpi      | 1  | 87098002  | 87101606  | - | 2337  | protein_coding       | alkaline phosphatase, intestinal [Source:MGI Symbol;Acc:MGI:1924018]                             |
| ENSMUSG000000112929 | 0          | 2.21557899 | Gm47729   | 10 | 16584268  | 16644555  | + | 533   | lincRNA              | predicted gene, 47729 [Source:MGI Symbol;Acc:MGI:6096862]                                        |
| ENSMUSG00000083773  | 2.43005302 | 0.28116752 | Gm13394   | 2  | 28933610  | 28934609  | - | 1000  | processed_pseudogene | predicted gene 13394 [Source:MGI Symbol;Acc:MGI:3651848]                                         |
| ENSMUSG00000031284  | 0.17994326 | 0.78887036 | Pak3      | X  | 143518591 | 143797796 | + | 9552  | protein_coding       | p21 (RAC1) activated kinase 3 [Source:MGI Symbol;Acc:MGI:1339656]                                |
| ENSMUSG00000022126  | 0.18076885 | 1.17912419 | Acod1     | 14 | 103046977 | 103056573 | + | 2623  | protein_coding       | aconitate decarboxylase 1 [Source:MGI Symbol;Acc:MGI:103206]                                     |
| ENSMUSG00000020159  | 12.5840371 | 43.0618428 | Gabrp     | 11 | 33550781  | 33578959  | - | 3377  | protein_coding       | gamma-aminobutyric acid (GABA) A receptor, pi [Source:MGI Symbol;Acc:MGI:2388363]                |
| ENSMUSG00000030607  | 5.35640253 | 18.3479784 | Acan      | 7  | 79053483  | 79115099  | + | 7469  | protein_coding       | aggrecan [Source:MGI Symbol;Acc:MGI:99602]                                                       |
| ENSMUSG00000021214  | 0.93299265 | 4.56576923 | Akr1c18   | 13 | 4132615   | 4150654   | - | 1207  | protein_coding       | aldo-keto reductase family 1, member C18 [Source:MGI Symbol;Acc:MGI:2145420]                     |
| ENSMUSG00000037705  | 0.75976395 | 0.16693255 | Tecta     | 9  | 42329619  | 42399929  | - | 7411  | protein_coding       | tectorin alpha [Source:MGI Symbol;Acc:MGI:109575]                                                |
| ENSMUSG00000084939  | 0.50773489 | 2.18382543 | Gm830     | 4  | 95464724  | 95487394  | - | 3502  | processed_transcript | predicted gene 830 [Source:MGI Symbol;Acc:MGI:2685676]                                           |
| ENSMUSG00000052305  | 5.17065398 | 19.5499294 | Hbb-bs    | 7  | 103826534 | 103828096 | - | 768   | protein_coding       | hemoglobin, beta adult s chain [Source:MGI Symbol;Acc:MGI:5474852]                               |
| ENSMUSG00000097084  | 0.87644489 | 0.10394363 | Foxl1     | 8  | 121127940 | 121130644 | + | 2705  | protein_coding       | forkhead box L1 [Source:MGI Symbol;Acc:MGI:1347469]                                              |
| ENSMUSG00000024049  | 1.49604845 | 0.40324246 | Myom1     | 17 | 71002633  | 71126856  | + | 10459 | protein_coding       | myomesin 1 [Source:MGI Symbol;Acc:MGI:1341430]                                                   |
| ENSMUSG00000022206  | 0.3345711  | 1.30566663 | Npr3      | 15 | 11839896  | 11907287  | - | 9389  | protein_coding       | natriuretic peptide receptor 3 [Source:MGI Symbol;Acc:MGI:97373]                                 |
| ENSMUSG00000017639  | 0.27045577 | 1.11697204 | Rab11fip4 | 11 | 79591212  | 79698023  | + | 7451  | protein_coding       | RAB11 family interacting protein 4 (class II) [Source:MGI Symbol;Acc:MGI:244292]                 |
| ENSMUSG00000052736  | 0.35692283 | 1.46098748 | Klrc2     | 6  | 129647496 | 129660689 | - | 5812  | protein_coding       | killer cell lectin-like receptor subfamily C, member 2 [Source:MGI Symbol;Acc:MGI:244292]        |
| ENSMUSG000000112329 | 3.14559255 | 0          | Gm47908   | 10 | 33477115  | 33477472  | - | 358   | TEC                  | predicted gene, 47908 [Source:MGI Symbol;Acc:MGI:6097152]                                        |
| ENSMUSG000000111171 | 0          | 0.63371091 | Gm47815   | 10 | 43034993  | 43050219  | + | 1686  | antisense            | predicted gene, 47815 [Source:MGI Symbol;Acc:MGI:6097001]                                        |
| ENSMUSG00000071317  | 0.24427812 | 0          | Bves      | 10 | 45335772  | 45372479  | + | 4610  | protein_coding       | blood vessel epicardial substance [Source:MGI Symbol;Acc:MGI:1346013]                            |
| ENSMUSG00000019874  | 0          | 0.85474927 | Fabp7     | 10 | 57784881  | 57788450  | + | 1250  | protein_coding       | fatty acid binding protein 7, brain [Source:MGI Symbol;Acc:MGI:101916]                           |
| ENSMUSG00000025370  | 0          | 0.30190353 | Cdh9      | 15 | 16728756  | 16857094  | + | 3539  | protein_coding       | cadherin 9 [Source:MGI Symbol;Acc:MGI:107433]                                                    |
| ENSMUSG00000042485  | 21.0512526 | 6.05101628 | Mustn1    | 14 | 30879200  | 30881610  | + | 1236  | protein_coding       | musculoskeletal, embryonic nuclear protein 1 [Source:MGI Symbol;Acc:MGI:19134]                   |
| ENSMUSG00000060402  | 0.10928016 | 0.60324242 | Chst8     | 7  | 34674468  | 34812711  | - | 5966  | protein_coding       | carbohydrate (N-acetyl)galactosamine 4-O) sulfotransferase 8 [Source:MGI Symbol;Acc:MGI:5531243] |
| ENSMUSG00000099068  | 6.37009569 | 0.26277339 | Gm27861   | 6  | 52161042  | 52161255  | + | 214   | misc_RNA             | predicted gene, 27861 [Source:MGI Symbol;Acc:MGI:5531243]                                        |
